# Supplementary material for: Effect of 1α,25-Dihydroxyvitamin D3 on the Radiation Response in Prostate Cancer: Association With IL-6 Signaling
Source: PubMed Central journal article supplement (PMC8181126; doi:10.3389/fonc.2021.619365), 2021-05-24

## **Suppl. Figure Legends**

### **Figure 1 Effects of Calcitriol on radiation responses *in vitro***

Effect of Calcitriol treatment on EMT-related proteins demonstrated by immunofluorescence *in vitro* (DAPI, blue; target protein, green).

### **Figure 2 Effects of Calcitriol on IL6 signaling *in vitro***

Effect of Calcitriol treatment on IL6 expression demonstrated by immunofluorescence *in vitro* (DAPI, blue; IL-6, green; p-stat3/p-p38, red).

Suppl. Figure 1

TRAMP-C1 6Gy

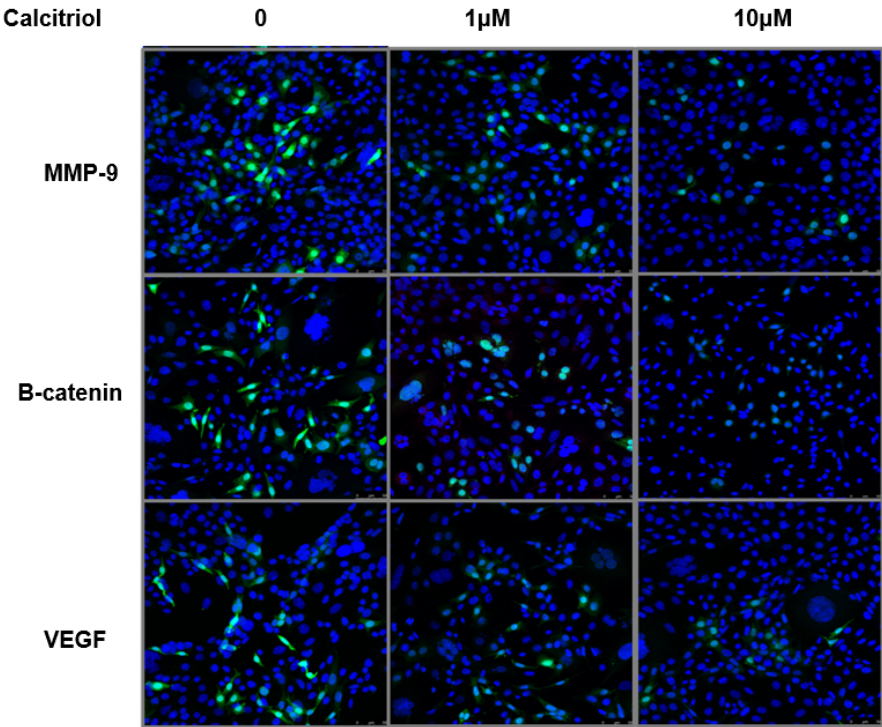

Suppl. Figure 2

TRAMP-C1 6Gy

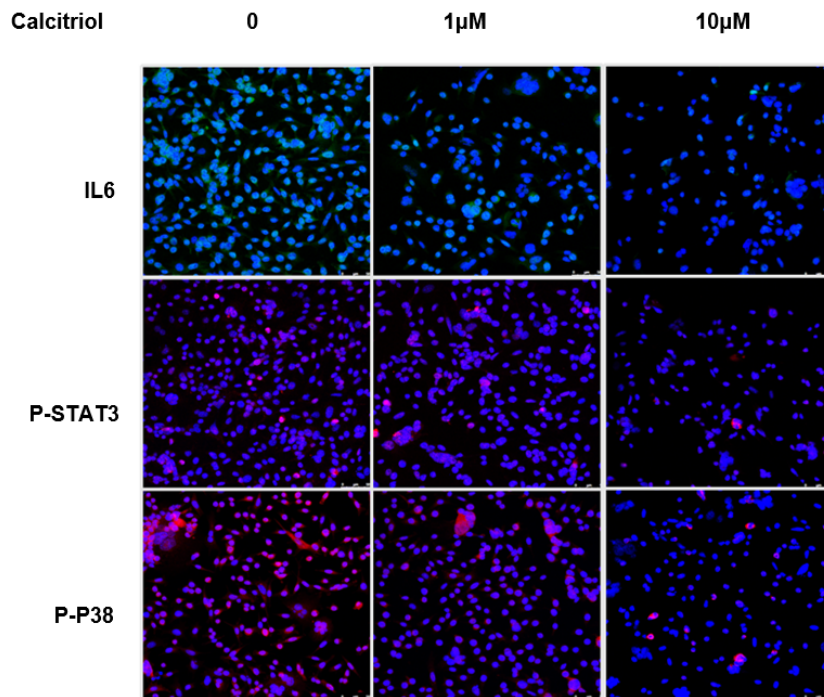

Supplement: DataSheet_1.pdf [file DataSheet_1.pdf]
